# Supplementary material
Source: PubMed Central journal article supplement (PMC3458340)
Supplement: 1202369109_pnas.201202369SI.pdf [file 1202369109_pnas.201202369SI.pdf]

# Supporting Information

Ayukawa et al. 10.1073/pnas.1202369109

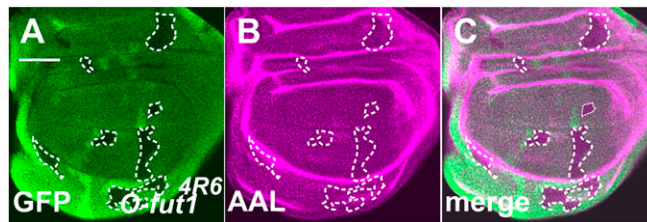

**Fig. S1.** Aleuria Aurantia Lectin (AAL) staining is not reduced in cells homozygous for *O-fut1*<sup>4R6</sup> *in vivo*. (A–C) Late third-instar wing imaginal discs carrying somatic clones homozygous for *O-fut1*<sup>4R6</sup> were stained with AAL. (A and C) Regions lacking GFP (green) were *O-fut1*<sup>4R6</sup> homozygous cells. (B and C) AAL-staining (magenta). C is a merged image of A and B. White broken lines indicate the borders of clones. (Scale bar in A, 50  $\mu$ m, applicable to A–C.)

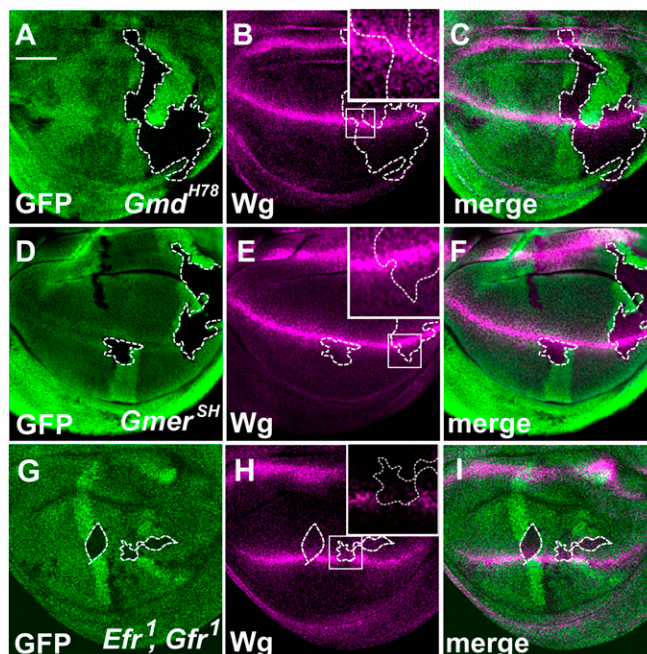

**Fig. S2.** Expression of Wg is not reduced in somatic clones homozygous for *Gmd* or *Gmer*. Late third-instar wing imaginal discs carrying somatic clones homozygous for *Gmd*<sup>H78</sup> (A–C), *Gmer*<sup>SH</sup> (D–F), or *Efr*<sup>1</sup> and *Gfr*<sup>1</sup> (G–I) were stained with an anti-Wg antibody (magenta). (A, C, D, F, G, and I) Regions lacking GFP (green) were somatic clones of the indicated mutants. C, F, and I are merged images of A and B, D and E, and G and H, respectively. *Insets*: Higher magnifications of the regions indicated by a white square in B, E, and H. Boundaries of the somatic clones are indicated by white broken lines. (Scale bar in A, 50  $\mu$ m, applicable to A–I.)

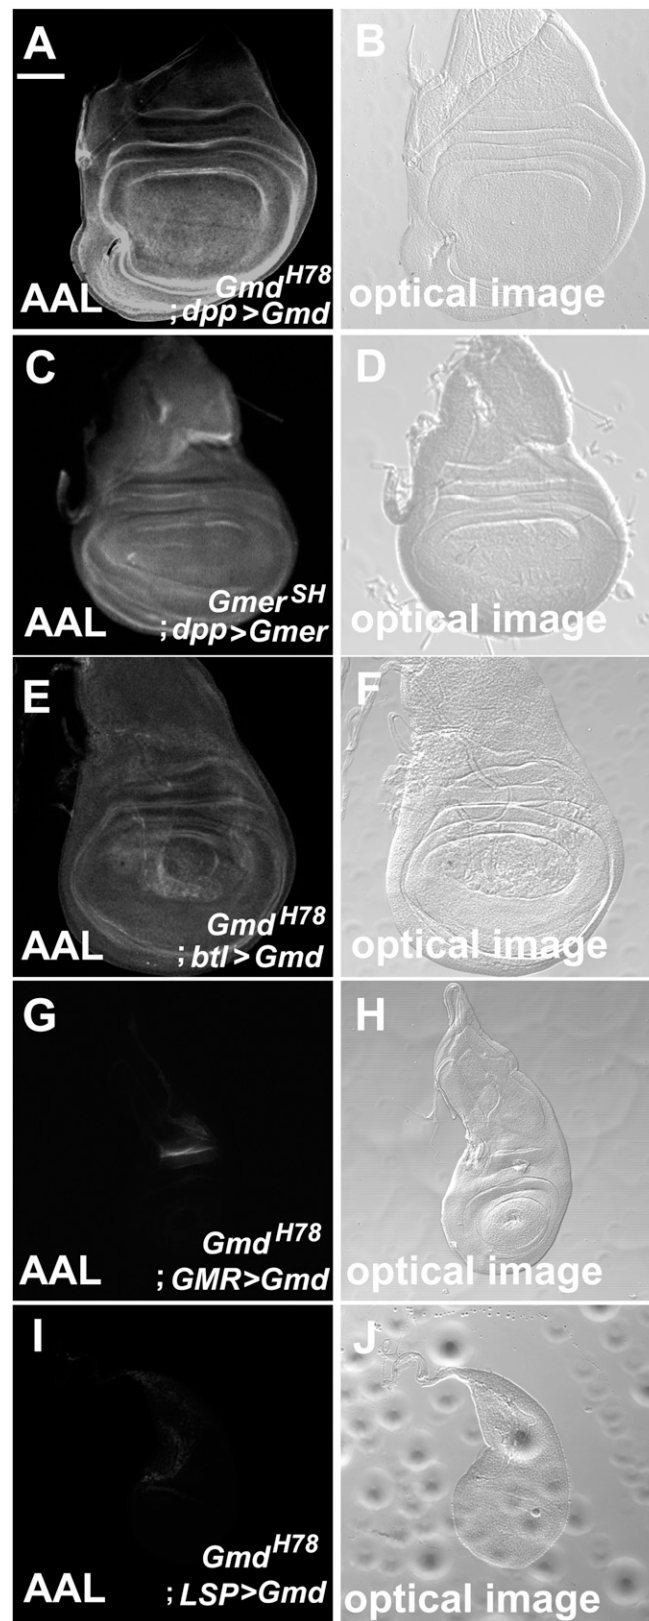

**Fig. S3.** Intercellular delivery of GDP-L-fucose is limited to a given organ. (A–J) Late third-instar wing imaginal discs stained with AAL (A, C, E, G, and I, magenta), and their optical images (B, D, F, H, and J). (A) *UAS-Gmd* was driven by *dpp-Gal4* in a *Gmd<sup>H78</sup>* homozygote. (B) *UAS-Gmer* was driven by *dpp-Gal4* in a *Gmer<sup>SH</sup>* homozygote. (C) *UAS-Gmd* was driven by *btl-Gal4* in a *Gmd<sup>H78</sup>* homozygote. (D) *UAS-Gmd* was driven by *GMR-Gal4* in a *Gmd<sup>H78</sup>* homozygote. (E) *UAS-Gmd* was driven by *Lsp-Gal4* in a *Gmd<sup>H78</sup>* homozygote. (Scale bar in A, 50 μm, applicable to A–J.)

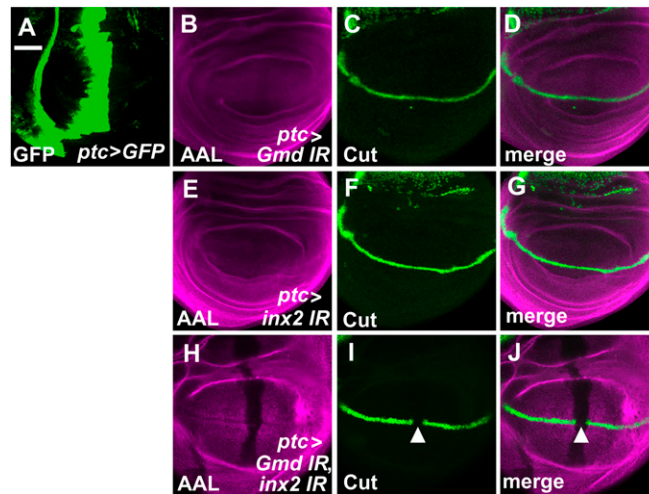

**Fig. 54.** A different RNAi against *inx2* gives similar results. (A) *ptc*-Gal4 drove the expression of *UAS-GFP* (green) where hairpin dsRNAs were produced (shown in B–J) in late third-instar wing imaginal discs. (B–J) Hairpin dsRNAs against *Gmd* (B–D), *inx2* (v102194) (E–G), or *Gmd* and *inx2* (H–J) were produced under the control of *ptc*-Gal4. (B, E, and H) AAL staining (magenta). (C, F, and I) Anti-Cut antibody staining (green). (D, G, and J) Merged images of B and C, E and F, and H and I, respectively. White arrowhead indicates the region of reduced *cut* expression in I and J. (Scale bar in A, 50  $\mu$ m, applicable to A–J.)

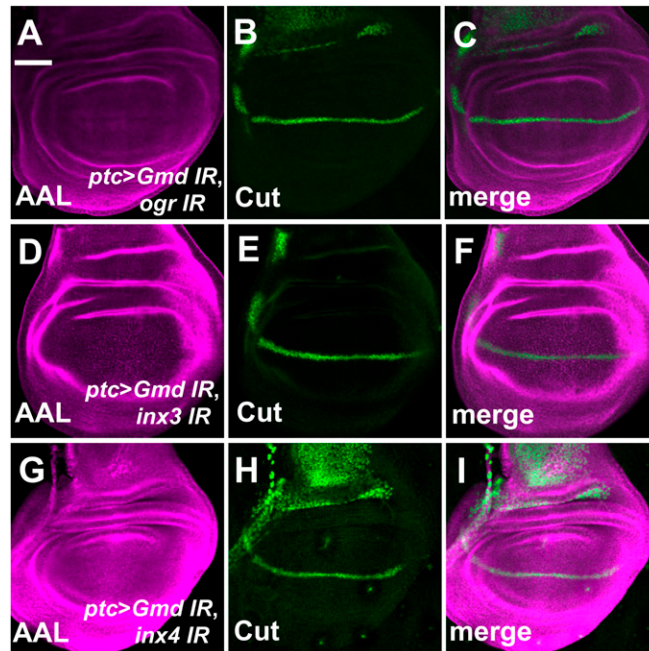

**Fig. 55.** Knockdown of *Gmd* and *ogr*, *inx3*, or *inx4* does not affect the expression of *cut* or AAL staining. (A–I) Late third-instar wing imaginal discs stained with AAL (A, C, D, F, G, and I, magenta) and anti-Cut antibody (B, C, E, F, H, and I, green). Hairpin dsRNAs against *Gmd* and *ogr* (VDRC7136) (A–C), *Gmd* and *inx3* (VDRC39095) (D–F), or *Gmd* and *inx4* (VDRC33277) (G–I) were synthesized under the control of *ptc*-Gal4. C, F, and I are merged images of A and B, D and E, G and H, respectively. (Scale bar in A, 50  $\mu$ m, applicable to A–I.)
